# Supplementary material
Source: Springer Nature journal article supplement (https://www.springerprofessional.de/resource/supplementary/13638_2014_947_MOESM11_ESM.pdf/11898840)

Performance Comparison of Centralized and Distributed Solution at Various SNR Regimes

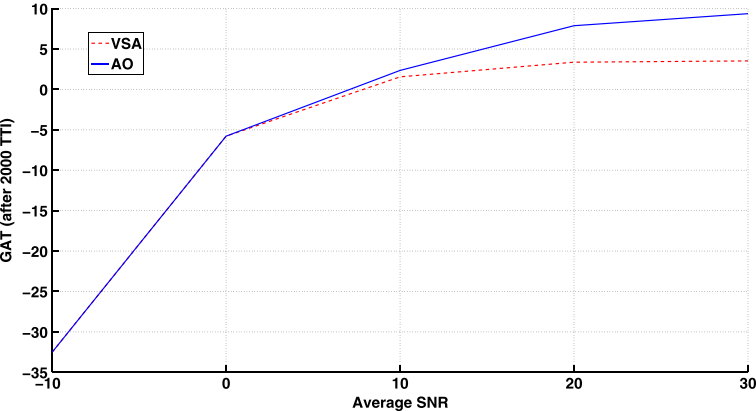

Supplement: MOESM11 [file 11898840]
